# Supplementary material
Source: Royal Society of Chemistry journal article supplement (doi:10.1039/d6dt00222f)
Supplement: d6dt00222f1.pdf [file d6dt00222f1.pdf]

## Supporting Information

### **S-vacancy-mediated efficient Z-scheme photocatalytic H<sub>2</sub> generation of ultrathin nanosheet-based 2D/2D intimate heterojunction**

Li Zeng,<sup>a</sup> Li Wang,<sup>a</sup> Lei Xu,<sup>a</sup> Ping Li,<sup>a</sup> Vladimir Turkevich,<sup>c</sup> Yanyan Li,<sup>ab</sup> Jixiang Xu,<sup>\*a</sup> Lei Wang<sup>a</sup> and Haifeng Lin<sup>\*a</sup>

<sup>a</sup> *Key Laboratory of Eco-chemical Engineering, International S&T Cooperation Foundation of Eco-chemical Engineering and Green Manufacture, College of Chemistry and Molecular Engineering, Qingdao University of Science and Technology, Qingdao 266042, PR China*

<sup>b</sup> *Shandong Provincial Key Laboratory of Olefin Catalysis and Polymerization, Yellow River Delta Jingbo Chemical Research Institute Co., Ltd, PR China*

<sup>c</sup> *V. Bakul Institute for Superhard Materials, National Academy of Sciences of Ukraine, Kyiv 04074, Ukraine*

\* Corresponding author. E-mail: hflin20088@126.com, xujix47@163.com.

## Characterization results

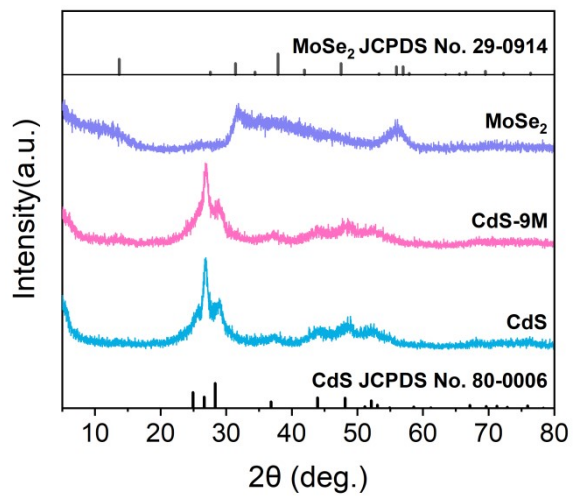

**Figure S1.** XRD patterns of MoSe<sub>2</sub>, CdS, and CdS-9M composite.

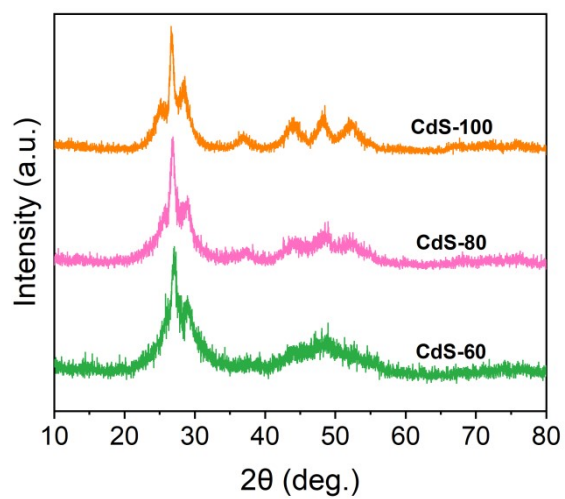

**Figure S2.** XRD patterns of CdS with varying synthesis temperatures.

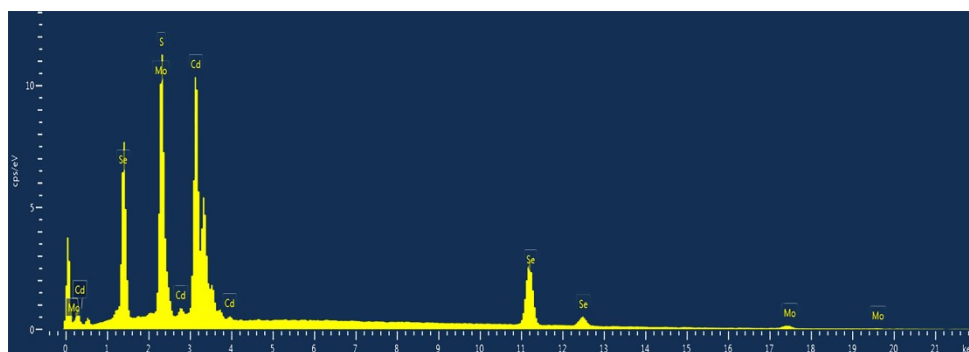

**Figure S3.** EDX spectrum of CdS-MoSe<sub>2</sub> heterojunction.

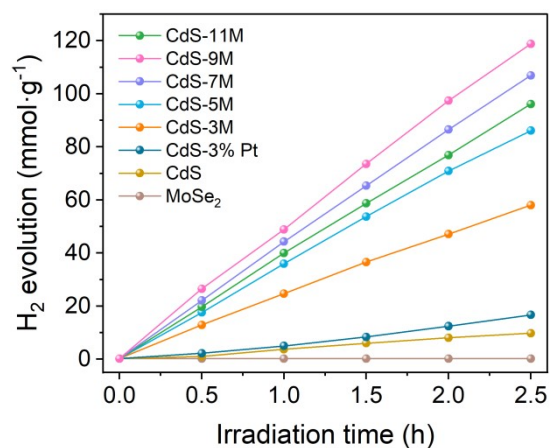

**Figure S4.** PHE activities of different samples.

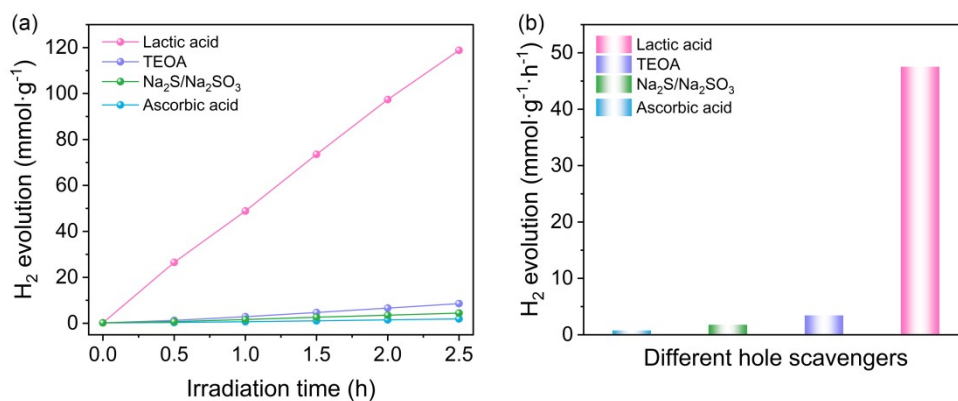

**Figure S5.** (a) PHE activities and (b) corresponding rates of CdS-9M measured with varying sacrificial agents.

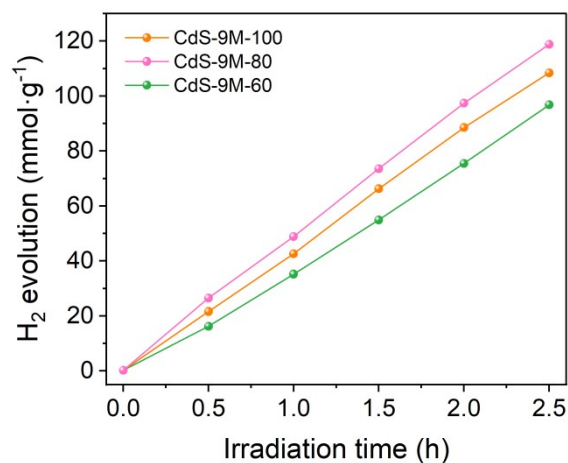

**Figure S6.** PHE activities of CdS-9M fabricated using CdS with different S<sub>V</sub> contents.

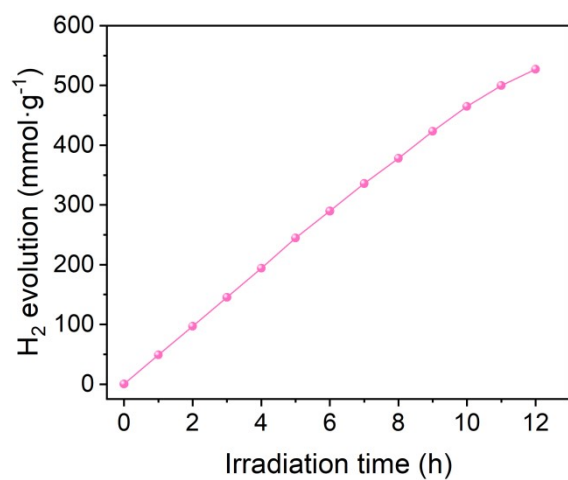

**Figure S7.** Long-term H<sub>2</sub> generation test of CdS-9M.

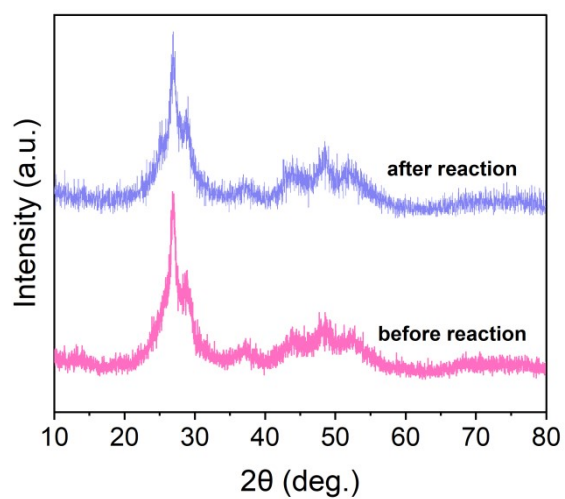

**Figure S8.** XRD patterns of CdS-9M before and after catalytic reaction.

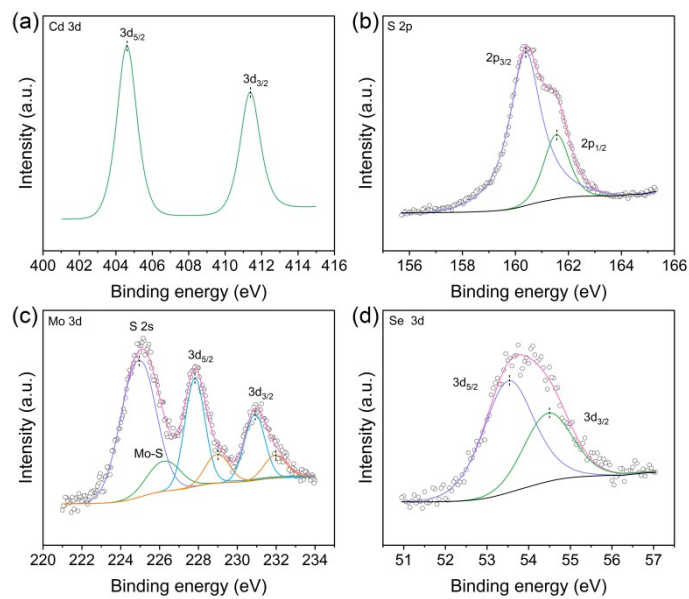

**Figure S9.** (a) Cd 3d, (b) S 2p, (c) Mo 3d, and (d) Se 3d XPS spectra of CdS-9M after H<sub>2</sub>-evolving measurement.

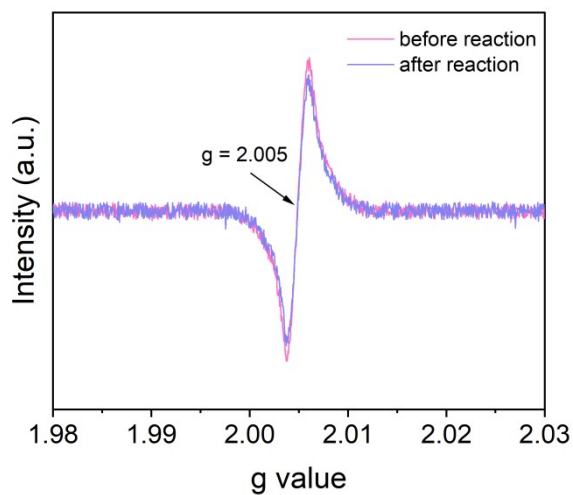

**Figure S10.** EPR spectra of CdS-9M before and after PHE test.

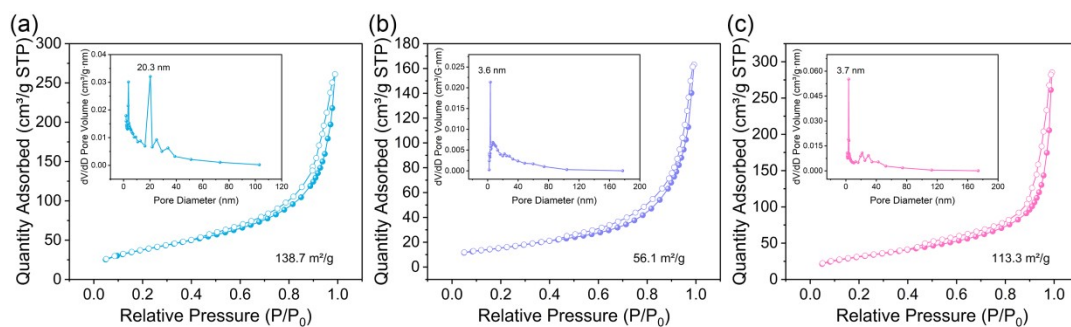

**Figure S11.** (a-c) N<sub>2</sub> adsorption-desorption isotherms and pore-size distributions (inset) of (a) CdS, (b) MoSe<sub>2</sub>, and (c) CdS-9M.

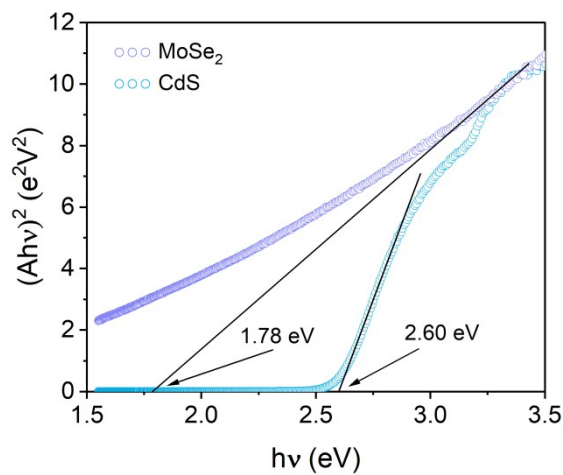

**Figure S12.** Tauc plots of CdS and MoSe<sub>2</sub>.

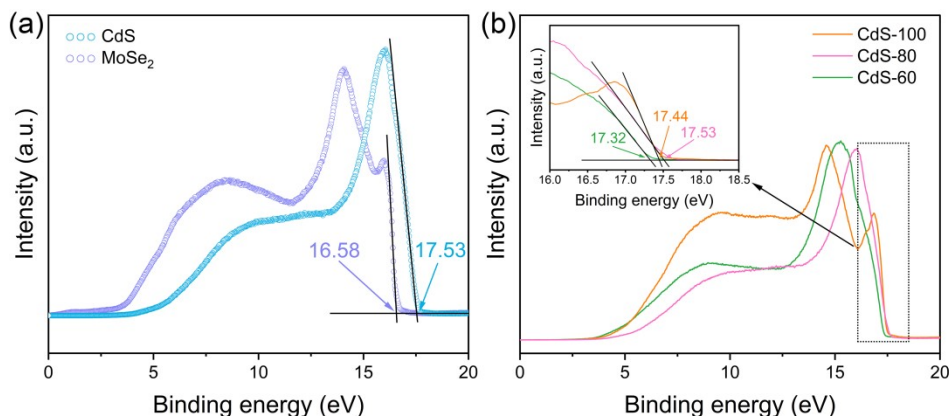

**Figure S13.** (a, b) UPS spectra of (a) CdS and MoSe<sub>2</sub> along with (b) CdS prepared with varying reaction temperatures.

The work function ( $\Phi$ ) of CdS and MoSe<sub>2</sub> was determined by the equation:  $\Phi = 21.22 \text{ eV} - E_{\text{cutoff}}$ , where 21.22 eV and  $E_{\text{cutoff}}$  represent the He(I) excitation energy and secondary cutoff binding energy, respectively.<sup>1, 2</sup> Based on the UPS spectra in Fig. S13a, the  $E_{\text{cutoff}}$  of CdS and MoSe<sub>2</sub> was recognized as 17.53 and 16.58 eV, thus their  $\Phi$  can be calculated to be 3.69 and 4.64 eV, respectively. As a result, the Fermi level ( $E_f$ ) of CdS and MoSe<sub>2</sub> was found as - 3.69 and - 4.64 eV, corresponding to - 0.81 and 0.14 V versus normal hydrogen electrode (vs. NHE), respectively.<sup>3</sup> Likewise, the  $E_f$  of CdS with differing synthesis temperatures could be discerned as - 0.60, - 0.72, and - 0.81 V vs. NHE for CdS-60, CdS-100, and CdS-80, respectively (Fig. S13b).

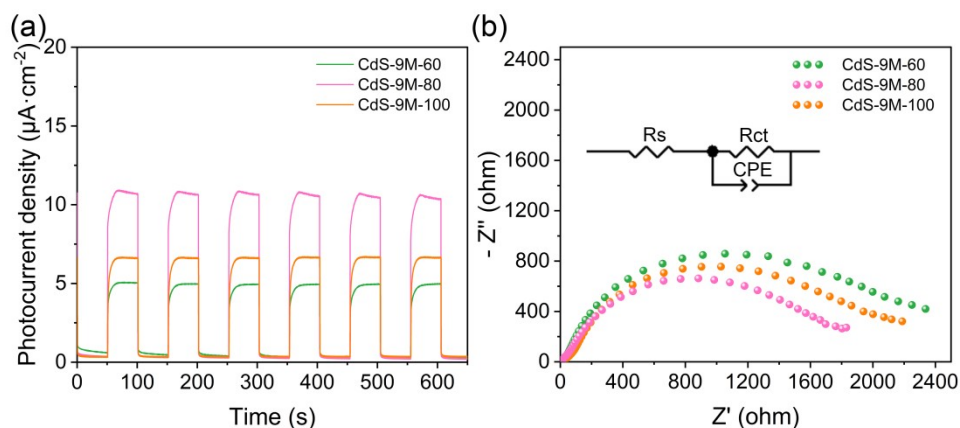

**Figure S14.** (a) Photocurrent densities and (b) EIS Nyquist curves of CdS-9M-60, CdS-9M-80, and CdS-9M-100.

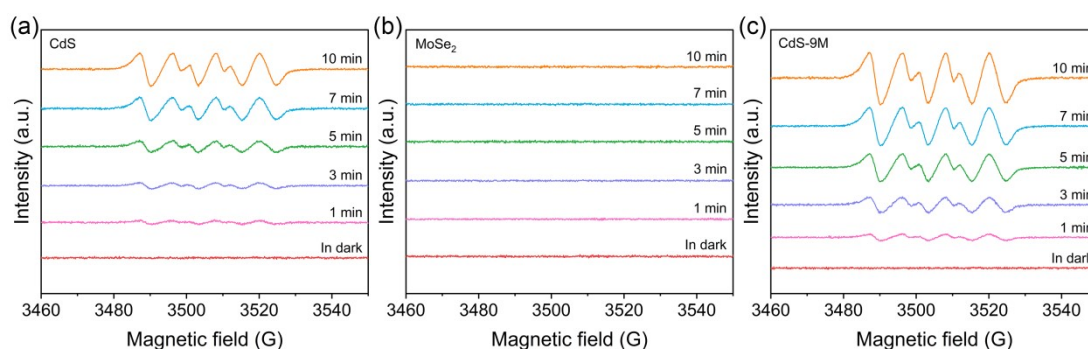

**Figure S15.** (a-c) Irradiation time-dependent EPR signals of DMPO·O<sub>2</sub><sup>-</sup> adducts produced by (a) CdS, (b) MoSe<sub>2</sub>, and (c) CdS-MoSe<sub>2</sub> composite. All figures were plotted with the identical abscissa and ordinate ranges.

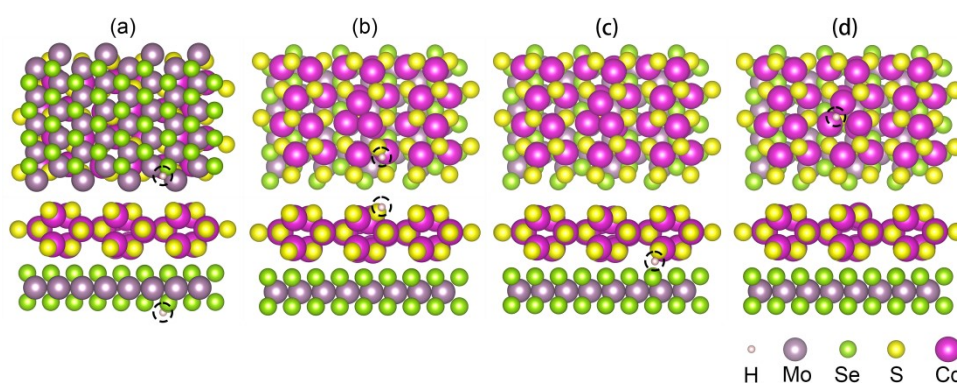

**Figure S16.** Optimized structural models of hydrogen adsorption on (a) Se site, (b) S site, (c) interface site, and (d) S<sub>V</sub> site of CdS-MoSe<sub>2</sub> heterojunction. The adsorbed hydrogen atoms were indicated by black dashed circles.

**Table S1.** Summarized PHE data of our CdS-MoSe<sub>2</sub> heterojunction and CdS-based photocatalysts reported in literatures.

| Photocatalyst                          | Hole scavenger<br>(aqueous solution)              | Light source<br>(Xe lamp) | Maximum rate<br>(mmol·h <sup>-1</sup> ·g <sup>-1</sup> ) | AQY<br>(420 nm)         | Reference |
|----------------------------------------|---------------------------------------------------|---------------------------|----------------------------------------------------------|-------------------------|-----------|
| CdS-MoSe <sub>2</sub>                  | Lactic acid                                       | λ ≥ 400 nm                | 47.52                                                    | 18.2%<br>22.9% (400 nm) | This work |
| CdS-MoS <sub>2</sub> -CoO <sub>x</sub> | TEOA                                              | UV-vis                    | 7.4                                                      | 7.6%                    | 4         |
| Cd/CdS                                 | Na <sub>2</sub> S/Na <sub>2</sub> SO <sub>3</sub> | λ > 420 nm                | 10.6                                                     | 12.1%                   | 5         |

|                                                                             |                                                   |                              |       |                 |    |
|-----------------------------------------------------------------------------|---------------------------------------------------|------------------------------|-------|-----------------|----|
| <b>CdS/NiCoAl-LDH</b>                                                       | Na <sub>2</sub> S/Na <sub>2</sub> SO <sub>3</sub> | $\lambda > 420$ nm           | 2.1   | -               | 6  |
| <b>CdS/WN</b>                                                               | Lactic acid                                       | $\lambda > 420$ nm           | 24.13 | 18.59 %         | 7  |
| <b>Cu-Ni/CdS</b>                                                            | Na <sub>2</sub> S/Na <sub>2</sub> SO <sub>3</sub> | $\lambda \geq 420$ nm        | 28.19 | 10.8%           | 8  |
| <b>CdS@MoS<sub>2</sub>/Ti<sub>3</sub>C<sub>2</sub></b>                      | Lactic acid                                       | $\lambda \geq 420$ nm        | 14.88 | -               | 9  |
| <b>Ni-CdS</b>                                                               | Na <sub>2</sub> S/Na <sub>2</sub> SO <sub>3</sub> | $\lambda > 420$ nm           | 20.28 | 13.62%          | 10 |
| <b>CdS/NiS</b>                                                              | Na <sub>2</sub> S/Na <sub>2</sub> SO <sub>3</sub> | $\lambda > 420$ nm           | 2.18  | -               | 11 |
| <b>CdS/Pt/NaTaO<sub>3</sub></b>                                             | Lactic acid                                       | $\lambda > 420$ nm           | 19.8  | 7.9% (350 nm)   | 12 |
| <b>CdS/Co<sub>3</sub>S<sub>4</sub></b>                                      | Lactic acid                                       | $\lambda \geq 420$ nm        | 23.45 | 18.5%           | 13 |
| <b>CdS/ZnS/Bi<sub>2</sub>Se<sub>3</sub></b>                                 | Na <sub>2</sub> S/Na <sub>2</sub> SO <sub>3</sub> | AM 1.5                       | 7.13  | 8.13%           | 14 |
| <b>Pt, Au/CdS</b>                                                           | TEOA                                              | $\lambda > 380$ nm           | 6.71  | 3.72% (380 nm)  | 15 |
| <b>graphdiyne/Ni-doped CdS</b>                                              | Lactic acid                                       | $\lambda \geq 420$ nm        | 13.33 | 4.76%           | 16 |
| <b>NaZn<sub>2</sub>(OH)(MoO<sub>4</sub>)<sub>2</sub>·H<sub>2</sub>O/CdS</b> | Na <sub>2</sub> S/Na <sub>2</sub> SO <sub>3</sub> | UV-vis                       | 17.44 | 9.3% (475 nm)   | 17 |
| <b>CdS/Pt@NU-1000</b>                                                       | Lactic acid                                       | $\lambda \geq 420$ nm        | 3.6   | -               | 18 |
| <b>NiS@N-doped carbon/CdS</b>                                               | TEOA                                              | 300 nm $> \lambda >$ 1100 nm | 6.1   | 0.66% (365 nm)  | 19 |
| <b>CdS/MoB MBene</b>                                                        | Lactic acid                                       | $\lambda \geq 420$ nm        | 16.89 | 32.9%           | 20 |
| <b>ZnIn<sub>2</sub>S<sub>4</sub>/CdS</b>                                    | Na <sub>2</sub> S/Na <sub>2</sub> SO <sub>3</sub> | $\lambda \geq 400$ nm        | 5.68  | 6.1% (400 nm)   | 21 |
| <b>NiS<sub>x</sub>Se<sub>2-x</sub>/phase junction CdS</b>                   | Na <sub>2</sub> S/Na <sub>2</sub> SO <sub>3</sub> | $\lambda \geq 400$ nm        | 11.43 | 15.3%           | 22 |
| <b>Mo<sub>2</sub>C/CdS</b>                                                  | Lactic acid                                       | $\lambda \geq 420$ nm        | 19.94 | 13.6%           | 23 |
| <b>CeO<sub>2</sub>@CdS</b>                                                  | Lactic acid                                       | $\lambda \geq 400$ nm        | 8.36  | 56.5%           | 24 |
| <b>F-TiO<sub>2</sub>/CdS</b>                                                | Na <sub>2</sub> S/Na <sub>2</sub> SO <sub>3</sub> | UV-vis                       | 1.70  | 4.3%            | 25 |
| <b>CdS-CuS-NiOOH</b>                                                        | Na <sub>2</sub> S/Na <sub>2</sub> SO <sub>3</sub> | $\lambda > 420$ nm           | 11.36 | 14.4%           | 26 |
| <b>Au/ZnWO<sub>4</sub>/CdS</b>                                              | Na <sub>2</sub> S/Na <sub>2</sub> SO <sub>3</sub> | 420 nm $> \lambda >$ 800 nm  | 5.48  | 2.62% (450 nm)  | 27 |
| <b>CdS-MXene/MoS<sub>2</sub></b>                                            | Lactic acid                                       | $\lambda > 420$ nm           | 38.5  | 34.6%           | 28 |
| <b>Cu<sub>2-x</sub>S/CdS</b>                                                | Na <sub>2</sub> S/Na <sub>2</sub> SO <sub>3</sub> | $\lambda \geq 420$ nm        | 5.75  | 0.80%           | 29 |
| <b>CoZnS<sub>x</sub>/CdS</b>                                                | Lactic acid                                       | $\lambda \geq 420$ nm        | 21.0  | -               | 30 |
| <b>Zn<sub>2</sub>MnO<sub>4</sub>/CdS</b>                                    | Na <sub>2</sub> S/Na <sub>2</sub> SO <sub>3</sub> | UV-vis                       | 22.42 | 4.15% (365 nm)  | 31 |
| <b>CdNCN-CdS</b>                                                            | Na <sub>2</sub> S/Na <sub>2</sub> SO <sub>3</sub> | $\lambda \geq 420$ nm        | 14.7  | 20.50% (400 nm) | 32 |
| <b>Pd single atoms/hollow CdS</b>                                           | Lactic acid                                       | $\lambda > 420$ nm           | 22.23 | 14.9%           | 33 |

**Table S2.** Fitting parameters for the EIS Nyquist curves of CdS, MoSe<sub>2</sub>, and CdS-9M composites prepared using CdS with varying formation temperatures. (Rs: series resistance, Rct: charge transfer resistance, CPE: constant phase angle element)

| Sample            | Rs ( $\Omega$ ) | Rct ( $\Omega$ ) | CPE-T (F)             | CPT-P |
|-------------------|-----------------|------------------|-----------------------|-------|
| CdS               | 24.09           | 2592             | $1.50 \times 10^{-4}$ | 0.842 |
| MoSe <sub>2</sub> | 38.06           | 4369             | $1.89 \times 10^{-4}$ | 0.836 |
| CdS-9M-60         | 22.11           | 2344             | $2.20 \times 10^{-4}$ | 0.814 |
| CdS-9M-80         | 27.41           | 1791             | $1.65 \times 10^{-4}$ | 0.807 |
| CdS-9M-100        | 43.35           | 2148             | $2.07 \times 10^{-4}$ | 0.786 |

**Table S3.** XPS peak binding energies of CdS, MoSe<sub>2</sub>, and CdS-9M with and without in-situ light irradiation.

| XPS species      | MoSe <sub>2</sub> | CdS            | CdS-9M         | light-irradiated CdS-9M |
|------------------|-------------------|----------------|----------------|-------------------------|
| Mo-S             | -                 | -              | 226.2 eV       | 226.4 eV                |
| Mo <sup>4+</sup> | 228.3-231.4 eV    | -              | 228.0-231.1 eV | 228.1-231.2 eV          |
| Mo <sup>5+</sup> | 229.4-232.4 eV    | -              | 228.9-231.9 eV | 229.1-232.1 eV          |
| Se <sup>2-</sup> | 53.9-54.8 eV      | -              | 53.6-54.5 eV   | 53.7-54.6 eV            |
| Cd <sup>2+</sup> | -                 | 404.3-411.0 eV | 404.7-411.4 eV | 404.5-411.2 eV          |
| S <sup>2-</sup>  | -                 | 160.0-161.2 eV | 160.4-161.6 eV | 160.3-161.5 eV          |

## References

- 1 X. Wei, S. Song, W. Cai, X. Luo, L. Jiao, Q. Fang, X. Wang, N. Wu, Z. Luo, H. Wang, Z. Zhu, J. Li, L. Zheng, W. Gu, W. Song, S. Guo and C. Zhu, *Chem*, 2023, **9**, 181-197.
- 2 X. Wang, X. Wang, J. Huang, S. Li, A. Meng and Z. Li, *Nat. Commun.*, 2021, **12**, 4112.
- 3 Y. Xu and M. A. A. Schoonen, *Am. Mineral.*, 2000, **85**, 543-556.
- 4 T. Di, Q. Deng, G. Wang, S. Wang, L. Wang and Y. Ma, *J. Mater. Sci. Technol.*, 2022, **124**, 209-216.
- 5 Z. Qi, J. Chen, Q. Li, N. Wang, S. A. C. Carabineiro and K. Lv, *Small*, 2023, **19**, 2303318.
- 6 R. Yang, W. Mu, L. He, J. Meng, X. Bi, W. Luo, S. Luo and X. Lei, *Chem. Eng. J.*, 2025, **503**, 158495.
- 7 H. Liu, J. Chen, W. Guo, Q. Xu and Y. Min, *J. Colloid Interface Sci.*, 2022, **613**, 652-660.
- 8 Q. Zeng, Y. Bao, S. Ning, Q. Yu, Y. Wei and D. Zeng, *J. Mater. Chem. A*, 2024, **12**, 17286-17294.
- 9 C. Wu, W. Huang, H. Liu, K. Lv and Q. Li, *Appl. Catal. B Environ. Energy*, 2023, **330**, 122653.
- 10 F. Wu, X. Zhang, L. Wang, G. Li, J. Huang, A. Song, A. Meng and Z. Li, *Small*, 2024, **20**, 2309439.
- 11 H. Zhang, C. Shao, Z. Wang, J. Zhang and K. Dai, *J. of Mater. Sci. Technol.*, 2024, **195**, 146-154.
- 12 J. Meng, J. Zhang, Y. Huang, Z. Wang, Y. Liao, Q. Zhou, Y. Wei, L. Gao and W.-L. Dai, *Chem. Eng. J.*, 2025, **525**, 170413.

- 13 H. Huang, Y. Cai, Q. Xu, M. Xiong, L. Ding, X. Wang, Q. Jiang, Q. Li, X. Han, J. Hu and Y. Liu, *Small*, 2025, **21**, 2501710.
- 14 Y.-T. Xiong, W.-X. Liu, L. Tian, P.-L. Qin, X.-B. Chen, L. Ma, Q.-B. Liu, S.-J. Ding and Q.-Q. Wang, *Adv. Funct. Mater.*, 2024, **34**, 2407819.
- 15 Z. Fan, Q. Xu, Y. Wang, Y. Cao, X. Zeng, Y. Xie and Z. Yu, *Chem. Eng. J.*, 2025, **511**, 162016.
- 16 D. Xiang, J. Yang, H. Xie, X. Hao and Z. Jin, *Chem. Eng. J.*, 2025, **525**, 169994.
- 17 J. Liu, X. Yang, X. Guo and Z. Jin, *J. Mater. Sci. Technol.*, 2024, **196**, 112-124.
- 18 H. Yang, J. Guo, Y. Xia, J. Yan and L. Wen, *J. Mater. Sci. Technol.*, 2024, **195**, 155-164.
- 19 D. Xu, J. Ke, Z. Yan, Y. Hu and J. Liu, *Appl. Catal. B Environ. Energy*, 2025, **362**, 124746.
- 20 S. Jin, Z. Shi, R. Wang, Y. Guo, L. Wang, Q. Hu, K. Liu, N. Li and A. Zhou, *ACS Nano*, 2024, **18**, 12524-12536.
- 21 D. Zhang, Z. Gao, D. Yang, L. Wang, X. Yang, K. Tang, H. Yang, X. Zhan, Z. Wang and W. Yang, *Carbon Energy*, 2025, **7**, e707.
- 22 N. Li, Y. Qiu, L. Li, J. Zhang, Y. Gao and L. Ge, *Small*, 2025, **21**, 2408057.
- 23 J. Wu, P. Qiao, P. An, M. Zhang, H. Xiu, Z. Song, K. Li, Y. Cui, Y. Wang and W. Yao, *Appl. Catal. B Environ. Energy* 2025, **377**, 125481.
- 24 X. Chen, Q. Zhang, Y. Wang, X. Han, X. Li and P. Xu, *J. Mater. Sci. Technol.*, 2025, **238**, 86-96.
- 25 W. Fu, S. Wang, Y. Zhang, B. Cheng and Y. Wu, *J. Mater. Sci. Technol.*, 2025, **232**, 181-190.
- 26 H. Lin, M. Kong, Z. Zou, X. Li, H. Wang, J. Xu, V. Turkevich, Y. Li, X. Wang and L. Wang, *Small*, 2025, **21**, 2410751.
- 27 W. Wu, N. Zhang and Y. Wang, *Adv. Funct. Mater.*, 2024, **34**, 2316604.
- 28 K. S. Ranjith, A. Mohammadi, G. S. R. Raju, Y. S. Huh and Y.-K. Han, *Nano Convergence*, 2024, **11**, 51.
- 29 K. Bang, B. Park, J.-Y. Jung and H. Song, *Small Struct.*, 2025, **6**, 2500468.
- 30 L. Song, K. Lin, D. Feng, B. Ma and F. Zhang, *Appl. Catal. B Environ. Energy*, 2025, **379**, 125657.
- 31 F. Liu, X. Li, B. Sun, Y. He, T. Gao and G. Zhou, *J. Mater. Sci. Technol.*, 2026, **250**, 233-242.
- 32 T. Huang, Z. Huang, X. Yang, S. Yang, Q. Gao, X. Cai, Y. Liu, Y. Fang, S. Zhang and S. Zhang, *Adv. Powder Mater.*, 2024, **3**, 100242.
- 33 Z. Huang, C. Guo, Q. Zheng, X. Long, J. Fan, P. Ma, Y. Dong, A. N. Alodhayb, Z. Chen, D. Wang and X. Yi, *J. Energy Chem.*, 2025, **108**, 210-220.
